# Supplementary material
Source: PubMed Central journal article supplement (PMC2741012)
Supplement: NIHMS124691-supplement-ESI.pdf [file NIHMS124691-supplement-ESI.pdf]

**Supplementary Information - S 1.**

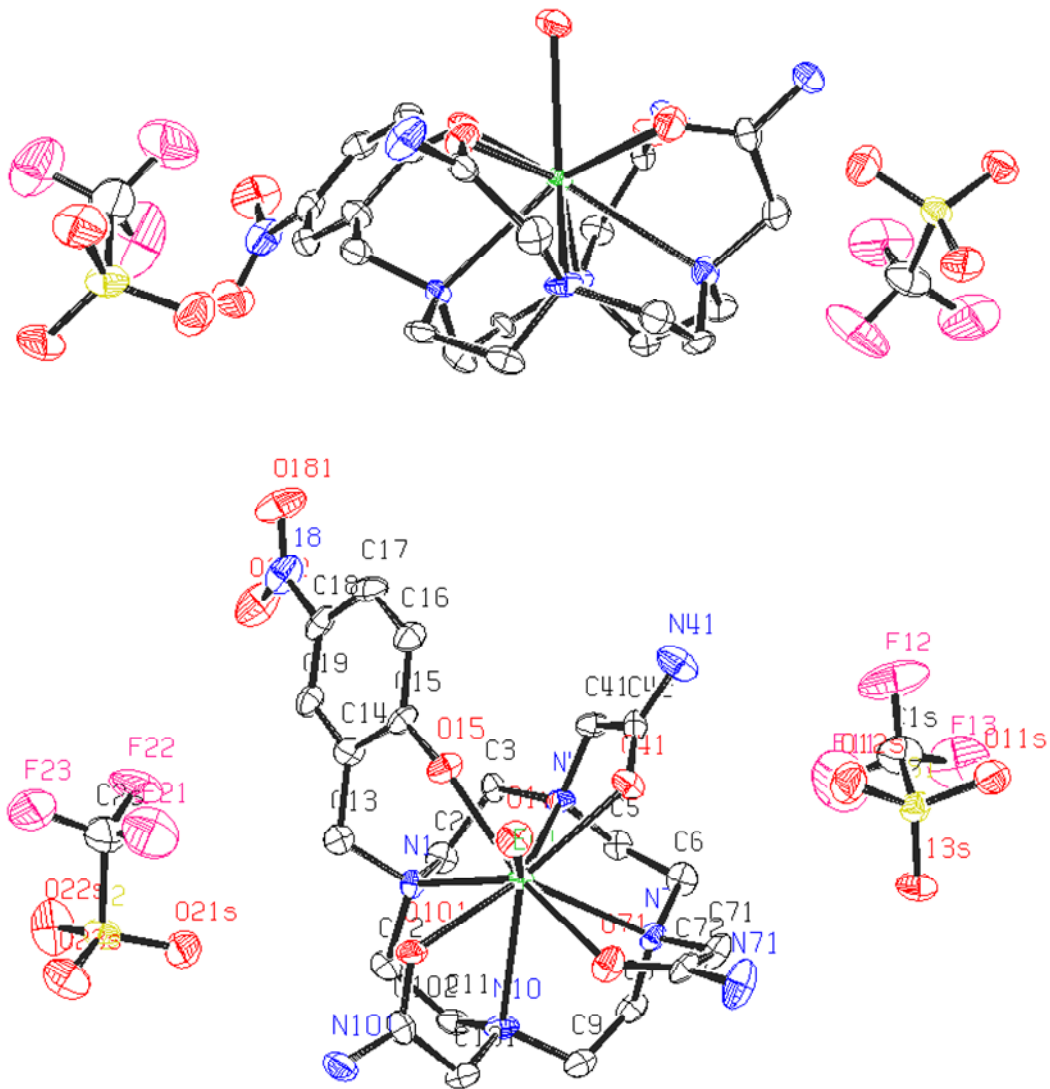

ORTEP renderings of the crystal structure of  $\text{Eu}(\text{NP-DO3AM}) \cdot \text{H}_2\text{O} \cdot (\text{CF}_3\text{SO}_3)_2$  showing 50% ellipsoids.

## Supplementary Information - S 2.

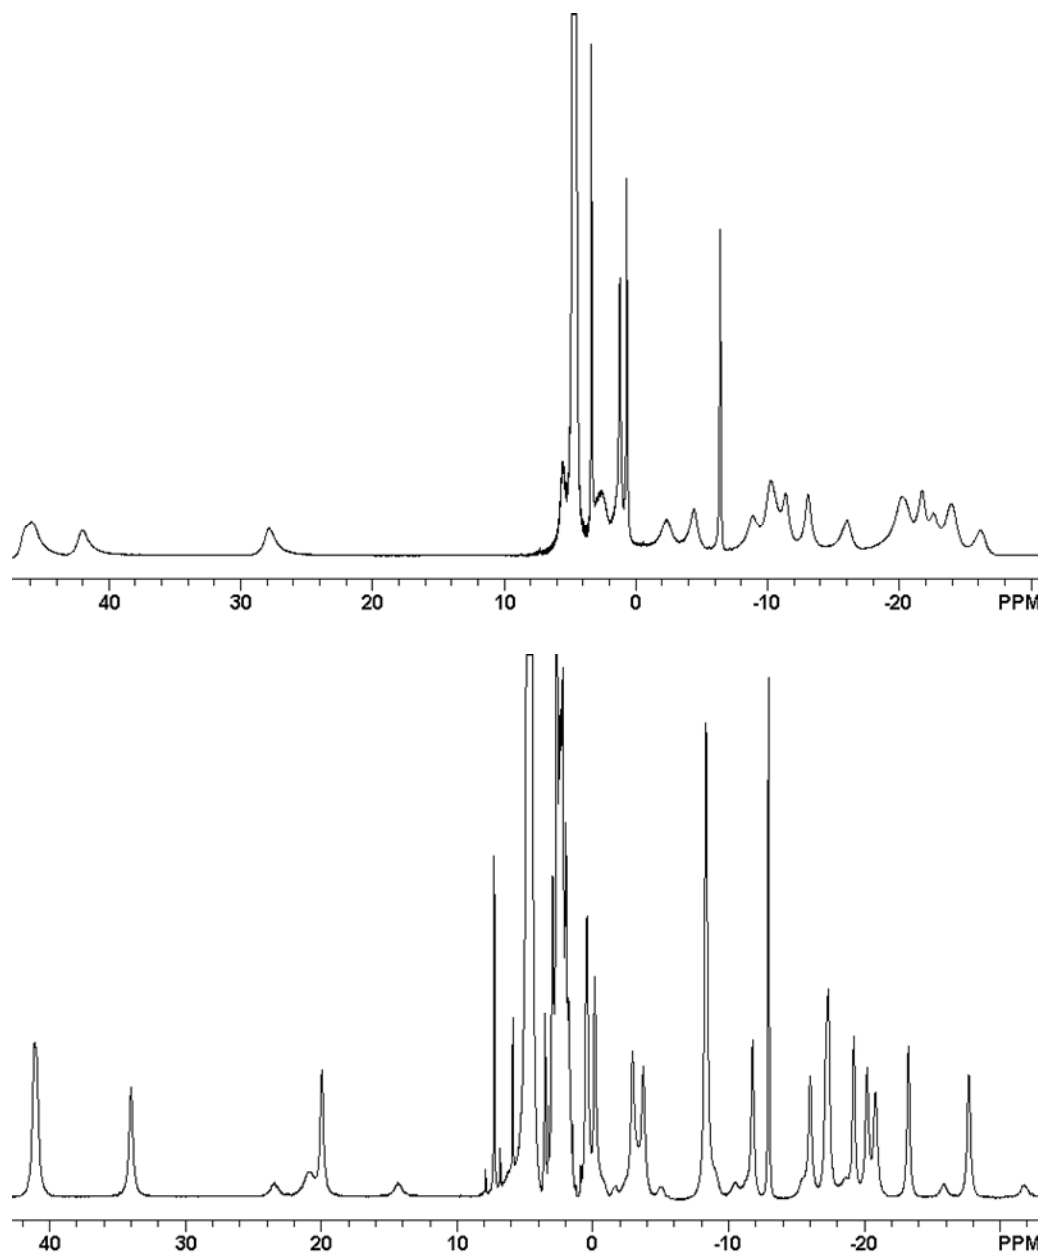

$^1\text{H}$  NMR spectra of  $\text{Eu}(\text{NP-DO3A})$  (bottom) and  $\text{Eu}(\text{NP-DO3AM})$  (top) recorded on at  $0^\circ\text{C}$  and 500 MHz in  $\text{D}_2\text{O}$  at pD = 8.4 and pD = 6.5, respectively.  $^1\text{H}$  NMR spectra of the corresponding Yb complexes recorded over the pH range 4 – 9 exhibited similar spectra but did not change in appearance as a function of pH.

## Supplementary Information – S 3

Determination of the hydration states of the Dy complexes by  $^{17}\text{O}$  NMR

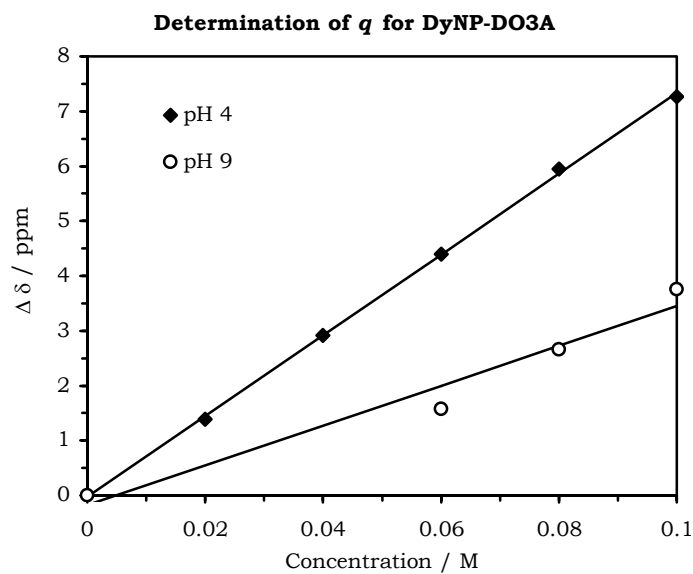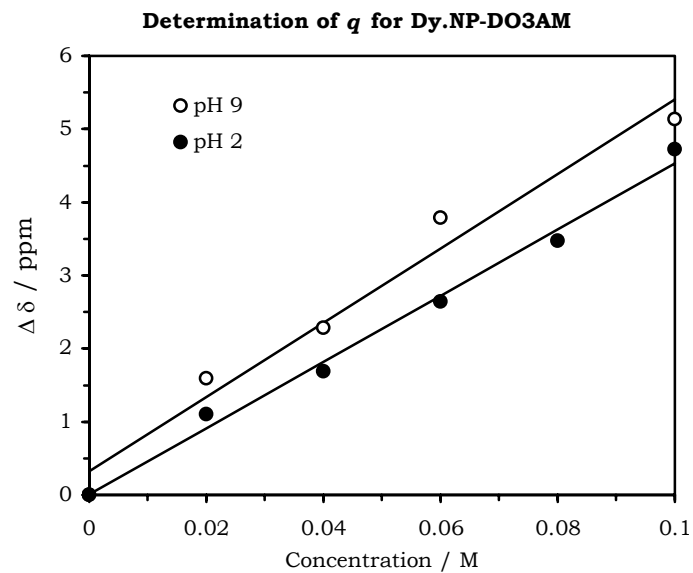

### Supplementary Information - S 4.

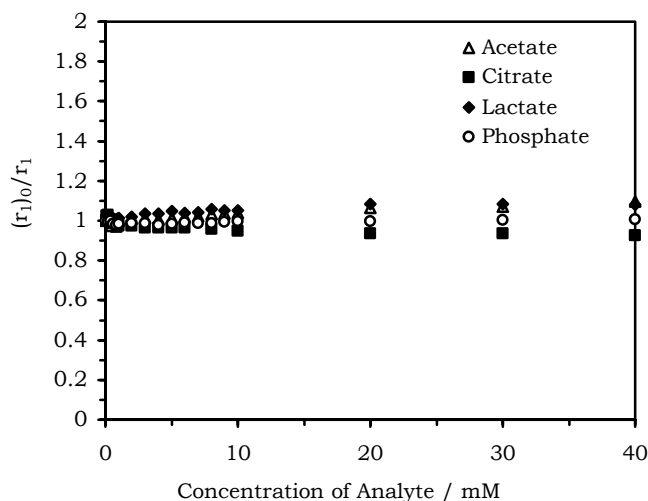

**The effect of anion concentration on relaxivity at pH 4.** For a 1 mM solution of GdNP-DO3A at pH 4 the value of the initial relaxivity  $(r_1)_0$  over the relaxivity  $(r_1)$  is shown as a function of the concentration of anion.

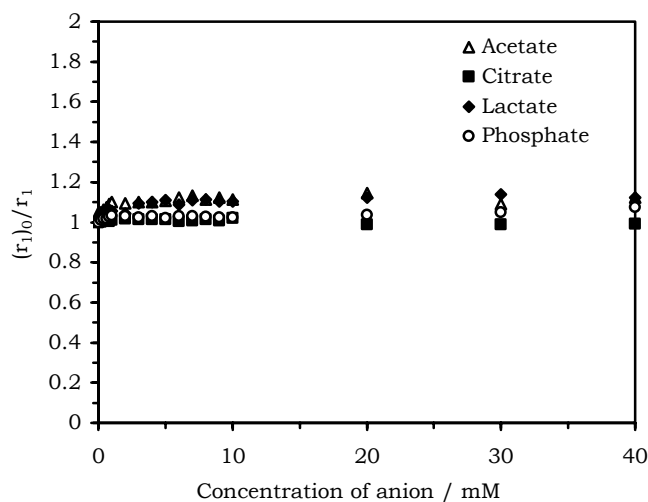

**The effect of anion concentration on relaxivity at pH 9.** For a 1 mM solution of GdNP-DO3A at pH 9 the value of the initial relaxivity  $(r_1)_0$  over the relaxivity  $(r_1)$  is shown as a function of the concentration of anion.
